# Supplementary material for: Auto-segmentation and time-dependent systematic analysis of mesoscale cellular structure in β-cells during insulin secretion
Source: PubMed Central journal article supplement (PMC8947144; doi:10.1371/journal.pone.0265567), 2022-03-24
Supplement: pone.0265567.s004.pdf [file pone.0265567.s004.pdf]

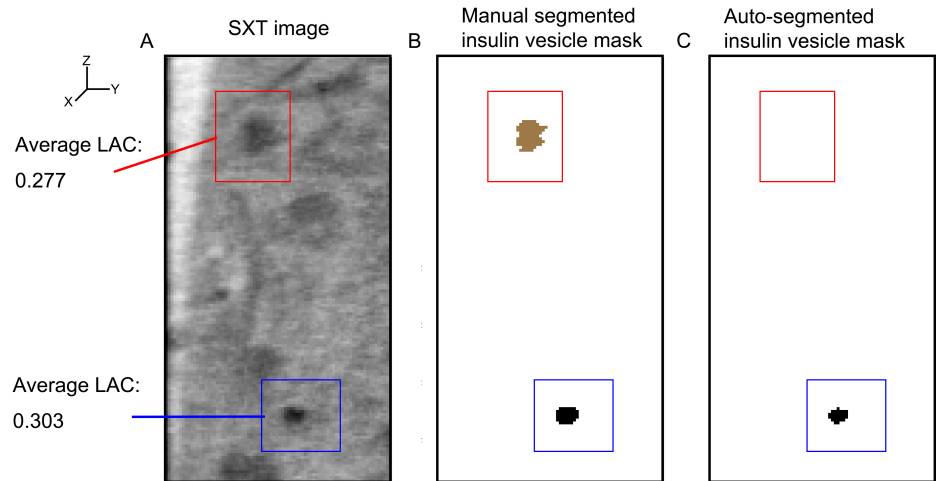

**S4 Fig. Example of insulin vesicles labeled in manual segmentation but not in auto-segmentation.** (A) Cropped 2D orthoslice of raw soft X-ray tomogram for Cell ID 766.8. Red and blue boxes show the organelle with an average LAC of 0.277 and 0.303, respectively. (B) Manually segmented mask labels two organelles as insulin vesicles. (C) Auto-segmented mask only labels the organelle with the LAC value of 0.303 as the insulin vesicle.
