# Supplementary material for: Auto-segmentation and time-dependent systematic analysis of mesoscale cellular structure in β-cells during insulin secretion
Source: PubMed Central journal article supplement (PMC8947144; doi:10.1371/journal.pone.0265567), 2022-03-24
Supplement: pone.0265567.s005.pdf [file pone.0265567.s005.pdf]

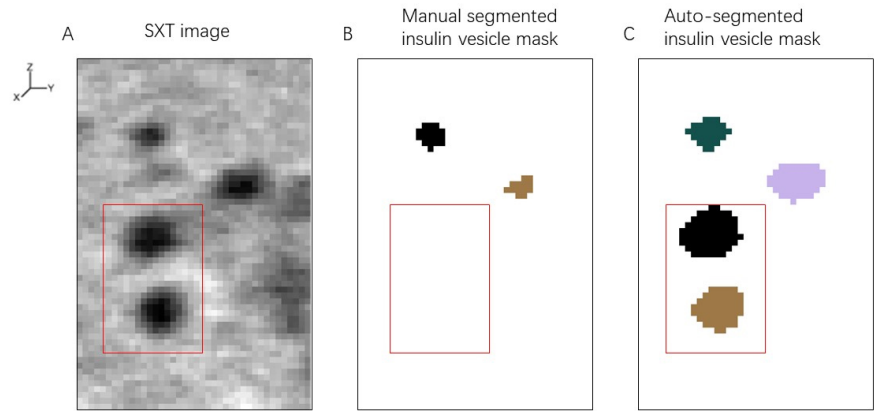

**S5 Fig. Example of insulin vesicles labeled in auto-segmentation but not in manual segmentation.** (A) Cropped 2D orthoslice of raw soft X-ray tomogram for Cell ID 784\_5. Red boxes show the region that contains no label in manually segmented mask but two labels in auto-segmented mask. (B) Manually segmented mask where two insulin vesicles are overlooked. (C) Auto-segmented mask showing correct prediction based on instance segmentation.
