# Supplementary material for: Auto-segmentation and time-dependent systematic analysis of mesoscale cellular structure in β-cells during insulin secretion
Source: PubMed Central journal article supplement (PMC8947144; doi:10.1371/journal.pone.0265567), 2022-03-24
Supplement: pone.0265567.s006.pdf [file pone.0265567.s006.pdf]

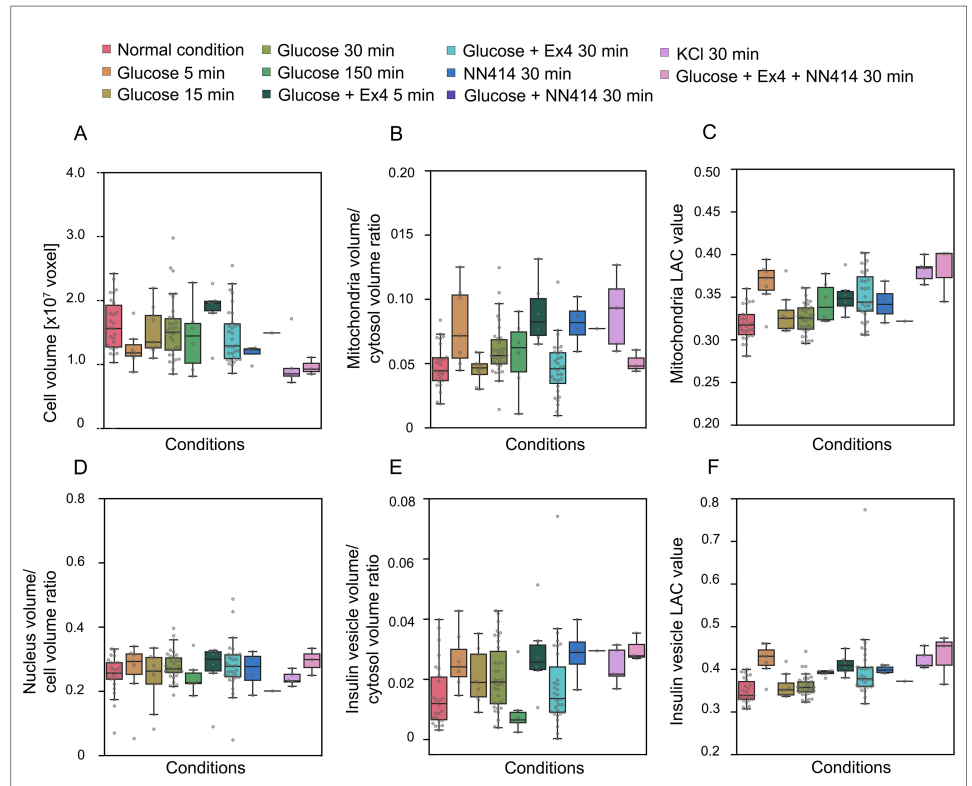

**S6 Fig. Comparison of organelles features and localization for all datasets under different conditions.** Each feature is compared in one plots. Multi-comparison tests results are listed in S1 Table.
