# Supplementary material for: Auto-segmentation and time-dependent systematic analysis of mesoscale cellular structure in β-cells during insulin secretion
Source: PubMed Central journal article supplement (PMC8947144; doi:10.1371/journal.pone.0265567), 2022-03-24
Supplement: pone.0265567.s008.pdf [file pone.0265567.s008.pdf]

**S1 Table** Dice of the semantic segmentation before and after 3D fusion post-processing.

| Dataset | Cell       |           | Nucleus    |           | Mitochondria |           |
|---------|------------|-----------|------------|-----------|--------------|-----------|
|         | Before (%) | After (%) | Before (%) | After (%) | Before (%)   | After (%) |
| 766_8   | 90.74      | 93.22     | 93.21      | 93.88     | 68.58        | 70.34     |
| 784_5   | 87.43      | 87.83     | 89.95      | 91.82     | 63.17        | 67.29     |
| 842_17  | 85.34      | 92.15     | 93.50      | 89.49     | 65.03        | 67.40     |
| Average | 87.84      | 91.60     | 88.89      | 91.74     | 65.59        | 68.34     |
