# Supplementary material for: Auto-segmentation and time-dependent systematic analysis of mesoscale cellular structure in β-cells during insulin secretion
Source: PLoS One. 2022 Mar 24;17(3):e0265567. doi: 10.1371/journal.pone.0265567 (PMC8947144; doi:10.1371/journal.pone.0265567)
Supplement: S2 Table — Cell numbers, average Linear absorption coefficient (LAC) values, and volumes of nucleus and cell masks are also listed. (PDF) [file pone.0265567.s009.pdf]

S2 Table Treatment conditions for all cells.

| Conditions             |                            |                      | Number of Datasets |                   | Cell volume    |                   | Nucleus volume |                   | nucleus size (nucleus volume/Cell volume, %) |                   | Cell LAC       |                             | Nucleus LAC               |                             | Mitochondria LAC          |                             | Insulin vesicle LAC       |                             | Insulin vesicle number    |        |    |
|------------------------|----------------------------|----------------------|--------------------|-------------------|----------------|-------------------|----------------|-------------------|----------------------------------------------|-------------------|----------------|-----------------------------|---------------------------|-----------------------------|---------------------------|-----------------------------|---------------------------|-----------------------------|---------------------------|--------|----|
| Treatment              | Glucose concentration (mM) | Treatment time (min) | Datasets           | Mean (voxel num.) | SE(voxel num.) | Mean (voxel num.) | SE(voxel num.) | Mean (voxel num.) | SE(voxel num.)                               | Mean (voxel num.) | SE(voxel num.) | Mean ( $\mu\text{m}^{-1}$ ) | SE ( $\mu\text{m}^{-1}$ ) | Mean ( $\mu\text{m}^{-1}$ ) | SE ( $\mu\text{m}^{-1}$ ) | Mean ( $\mu\text{m}^{-1}$ ) | SE ( $\mu\text{m}^{-1}$ ) | Mean ( $\mu\text{m}^{-1}$ ) | SE ( $\mu\text{m}^{-1}$ ) | Number | SE |
| Normal                 | /                          | /                    | 26                 | 1.50E+07          | 6.94E+05       | 3.86E+06          | 1.64E+05       | 26.79%            | 2.49E-01                                     | 2.62E-03          | 2.49E-01       | 2.37E-03                    | 3.16E-01                  | 3.77E-03                    | 3.44E-01                  | 5.34E-03                    | 514                       | 47                          |                           |        |    |
|                        |                            |                      | 7                  | 1.25E+07          | 1.09E+06       | 3.32E+06          | 4.91E+05       | 26.57%            | 2.98E-01                                     | 1.11E-02          | 2.80E-01       | 7.84E-03                    | 3.60E-01                  | 9.81E-03                    | 4.22E-01                  | 1.40E-02                    | 791                       | 123                         |                           |        |    |
| Glucose                | 25                         | 5                    | 9                  | 1.24E+07          | 1.09E+06       | 3.34E+06          | 4.91E+05       | 25.85%            | 2.57E-01                                     | 1.01E-02          | 2.48E-01       | 7.13E-03                    | 3.30E-01                  | 7.57E-03                    | 3.61E-01                  | 9.00E-03                    | 862                       | 84                          |                           |        |    |
|                        |                            | 25                   | 34                 | 1.35E+07          | 1.24E+06       | 3.64E+06          | 5.27E+05       | 24.06%            | 2.35E-01                                     | 9.75E-03          | 2.35E-01       | 3.75E-03                    | 3.24E-01                  | 9.53E-03                    | 3.55E-01                  | 3.93E-03                    | 780                       | 165                         |                           |        |    |
| Glucose + Ex-4         | 25                         | 150                  | 6                  | 1.43E+07          | 2.10E+06       | 3.44E+06          | 5.27E+05       | 24.49%            | 2.84E-01                                     | 5.93E-03          | 2.72E-01       | 6.55E-03                    | 3.42E-01                  | 9.78E-03                    | 3.91E-01                  | 9.29E-03                    | 463                       | 175                         |                           |        |    |
|                        |                            | 25                   | 31                 | 1.85E+07          | 1.62E+06       | 4.89E+06          | 7.01E+05       | 26.14%            | 2.84E-01                                     | 5.93E-03          | 2.69E-01       | 6.34E-03                    | 3.51E-01                  | 8.61E-03                    | 4.10E-01                  | 9.79E-03                    | 1071                      | 174                         |                           |        |    |
| Glucose + Ex-4         | 25                         | 30                   | 3                  | 1.45E+07          | 7.67E+05       | 4.06E+06          | 3.43E+05       | 27.94%            | 2.75E-01                                     | 4.35E-03          | 2.50E-01       | 5.06E-03                    | 3.52E-01                  | 5.11E-03                    | 4.00E-01                  | 1.41E-02                    | 619                       | 61                          |                           |        |    |
|                        |                            | 30                   | 3                  | 9.62E+06          | 7.71E+05       | 2.85E+06          | 4.31E+05       | 29.65%            | 3.07E-01                                     | 1.73E-02          | 2.96E-01       | 1.50E-02                    | 3.82E-01                  | 1.88E-02                    | 4.31E-01                  | 3.35E-02                    | 759                       | 75                          |                           |        |    |
| Glucose + Ex-4 + NN414 | 25                         | 30                   | 1                  | 1.49E+07          | /              | 3.00E+06          | /              | 20.12%            | 2.47E-01                                     | /                 | 2.46E-01       | /                           | 3.22E-01                  | /                           | 3.22E-01                  | /                           | 798                       | /                           |                           |        |    |
|                        |                            | 30                   | 4                  | 1.49E+07          | 9.05E+05       | 3.22E+06          | 7.00E+05       | 27.85%            | 2.80E-01                                     | 1.23E-02          | 2.78E-01       | 8.72E-03                    | 3.51E-01                  | 1.01E-02                    | 4.01E-01                  | 5.45E-03                    | 669                       | 90                          |                           |        |    |
| Normal + NN414         | 0                          | 30                   | 4                  | 1.16E+07          | /              | 2.41E+06          | /              | 23.96%            | 3.14E-01                                     | /                 | 3.04E-01       | /                           | 6.99E-03                  | /                           | 6.13E-03                  | /                           | 9.82E-03                  | /                           | 559                       | 89     |    |
|                        |                            | 0                    | 5                  | 1.01E+07          | 1.80E+06       | 2.41E+06          | 4.10E+05       | 23.96%            | 3.14E-01                                     | 5.54E-03          | 3.04E-01       | 6.99E-03                    | 6.13E-03                  | 4.22E-01                    | 9.82E-03                  | 9.82E-03                    | 9.82E-03                  | 9.82E-03                    | 9.82E-03                  | 559    | 89 |

Cell numbers, average LAC values, and volumes of nucleus and cell masks are also listed.
